# Supplementary material
Source: PubMed Central journal article supplement (PMC5871606)
Supplement: NIHMS951121-supplement-TOC_figure.pdf [file NIHMS951121-supplement-TOC_figure.pdf]

## Table of Contents Image

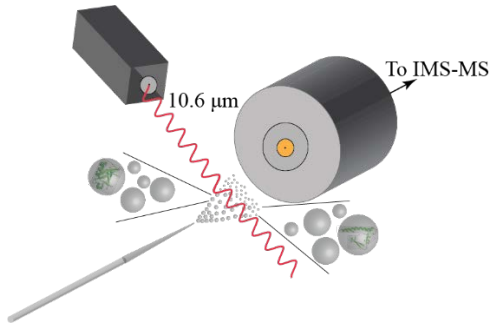

Irradiation of protein molecules in nanodroplets with 10.6 μm laser light reveals details of conformer stabilities and unfolding pathways.
